# Supplementary material for: Effect of a customized digital adherence tool on retention in care and adherence to antiretroviral treatment in breastfeeding women, children and adolescents living with HIV in Tanzania: a mixed-methods study followed by clinical trials
Source: Research Square preprint supplement (doi:10.21203/rs.3.rs-2604485/v1), 2023-03-10
Supplement: Supplementary file 1 [file 5cac7b9f2955ecc50c7de3af.docx]

## Annex 1

Figure 1a. SPIRIT-figure for the schedule of enrolment, interventions, and assessments for stable children and adolescents living with HIV.*

|  | **Enrolment** | **Allocation** | **Follow-up** | | | | | **Close-out** | |
| --- | --- | --- | --- | --- | --- | --- | --- | --- | --- |
| **TIMEPOINT**** | ***0*** | **0** | ***M3*** | ***M6*** | ***M9*** | ***M12*** | ***M12+*** | |
| **ENROLMENT:** |  |  |  |  |  |  |  | |
| **Eligibility screen** | X |  |  |  |  |  |  | |
| **Patient information and explanation** | X |  |  |  |  |  |  | |
| **Informed consent** | X |  |  |  |  |  |  | |
| ***In- and exclusion criteria*** | X |  |  |  |  |  |  | |
| **Allocation** |  | X |  |  |  |  |  | |
| **INTERVENTIONS:** |  |  |  |  |  |  |  | |
| ***DAT with SMS reminder cues and tailored feedback*** |  |  | X | X | X | X |  | |
| ***Control*** |  |  | X | X | X | X |  | |
| **ASSESSMENTS:** |  |  |  |  |  |  |  | |
| ***Enrolment interview*** |  | X |  |  |  |  |  | |
| ***Self-reported adherence and pharmacy refill counts*** |  | X | X | X | X | X |  | |
| ***Psychosocial interview*** |  | X |  | X |  | X |  | |
| ***Viral load blood sample*** |  | X |  |  |  | X |  | |
| ***Exit-interview, in-depth interview and focus group discussions*** |  |  |  |  |  |  | X | |

Figure 1b. SPIRIT-figure for the schedule of enrolment, interventions, and assessments for unstable children and adolescents living with HIV

|  | **Enrolment** | **Allocation** | **Follow-up** | | | | | | **Close-out** | |
| --- | --- | --- | --- | --- | --- | --- | --- | --- | --- | --- |
| **TIMEPOINT**** | ***0*** | **0** | ***M2*** | ***M4*** | ***M6*** | ***M8*** | ***M10*** | ***M12*** | ***M12+*** |
| **ENROLMENT:** |  |  |  |  |  |  |  |  |  |
| **Eligibility screen** | X |  |  |  |  |  |  |  |  |
| **Patient information and explanation** | X |  |  |  |  |  |  |  |  |
| **Informed consent** | X |  |  |  |  |  |  |  |  |
| ***In- and exclusion criteria*** | X |  |  |  |  |  |  |  |  |
| **Allocation** |  | X |  |  |  |  |  |  |  |
| **INTERVENTIONS:** |  |  |  |  |  |  |  |  |  |
| ***DAT with SMS reminder cues and tailored feedback*** |  |  | X | X | X | X | X | X |  |
| ***Control*** |  |  | X | X | X | X | X | X |  |
| **ASSESSMENTS:** |  |  |  |  |  |  |  |  |  |
| ***Enrolment interview*** |  | X |  |  |  |  |  |  |  |
| ***Self-reported adherence and pharmacy refill counts*** |  | X | X | X | X | X | X | X |  |
| ***Psychosocial interview*** |  | X |  |  | X |  |  | X |  |
| ***Viral load blood sample*** |  | X |  |  |  |  |  | X |  |
| ***Exit-interview, in-depth interview and focus group discussions*** |  |  |  |  |  |  |  |  | X |

Figure 1c. SPIRIT-figure for the schedule of enrolment, interventions, and assessments for breastfeeding women living with HIV.*

|  | **Enrolment** | **Allocation** | **Follow-up** | | | | | | | | | | **Close-out** |
| --- | --- | --- | --- | --- | --- | --- | --- | --- | --- | --- | --- | --- | --- |
| **TIMEPOINT**** | ***0*** | **0** | ***M1*** | ***M2*** | ***M4*** | ***M6*** | ***M8*** | ***M10*** | ***M12*** | ***M14*** | ***M16*** | ***M18*** | ***M18+*** |
| **ENROLMENT:** |  |  |  |  |  |  |  |  |  |  |  |  |  |
| **Eligibility screen** | X |  |  |  |  |  |  |  |  |  |  |  |  |
| **Patient information and explanation** | X |  |  |  |  |  |  |  |  |  |  |  |  |
| **Informed consent** | X |  |  |  |  |  |  |  |  |  |  |  |  |
| ***In- and exclusion criteria*** | X |  |  |  |  |  |  |  |  |  |  |  |  |
| **Allocation** |  | X |  |  |  |  |  |  |  |  |  |  |  |
| **INTERVENTIONS:** |  |  |  |  |  |  |  |  |  |  |  |  |  |
| ***DAT with SMS reminder cues and tailored feedback*** |  |  | X | X | X | X | X | X | X | X | X | X |  |
| ***Control*** |  |  | X | X | X | X | X | X | X | X | X | X |  |
| **ASSESSMENTS:** |  |  |  |  |  |  |  |  |  |  |  |  |  |
| ***Enrolment interview*** |  | X |  |  |  |  |  |  |  |  |  |  |  |
| ***Self-reported adherence and pharmacy refill counts*** |  | X | X | X | X | X | X | X | X | X | X | X |  |
| ***Psychosocial interview*** |  | X |  |  |  | X |  |  | X |  |  | X |  |
| ***Viral load blood sample*** |  | X |  |  |  |  |  |  | X |  |  | X |  |
| ***Infant HIV testing*** |  | X |  |  |  |  | X |  |  |  |  | X |  |
| ***Exit-interview, in-depth interview and focus group discussions*** |  |  |  |  |  |  |  |  |  |  |  |  | X |
